1 **Nutrigonometry I: using right-angle triangles to quantify nutritional trade-offs in**  
2 **multidimensional performance landscapes**

3 Authors: Juliano Morimoto<sup>1\*</sup>, Pedro Conceição<sup>2</sup>, Christen Mirth<sup>3</sup>, Mathieu Lihoreau<sup>4</sup>

4 Authors' affiliations:

5 <sup>1</sup> School of Biological Sciences, University of Aberdeen, Zoology Building, Tillydrone Ave,  
6 Aberdeen AB24 2TZ

7 <sup>2</sup> Institute of Mathematics, University of Aberdeen, King's College, Aberdeen AB24 3FX

8 <sup>3</sup> School of Biological Sciences, Monash, University, Melbourne, Victoria, Australia

9 <sup>4</sup> Research Center on Animal Cognition (CRCA), Center for Integrative Biology (CBI);  
10 CNRS, University Paul Sabatier – Toulouse III, France.

11

12 \* Correspondence:

13 Dr Juliano Morimoto

14 [juliano.morimoto@abdn.ac.uk](mailto:juliano.morimoto@abdn.ac.uk)

15 **Running-title:** Trigonometry to measure fitness trade-offs

16 **Keywords:** Nutritional Geometry, trigonometry, lifespan-reproduction trade-off, fitness  
17 maps, *Drosophila melanogaster*

18

19 **Authors' contributions**

20 JM conceptualised the nutrigonometry model, coded the scripts to conduct the analysis, and  
21 wrote the first draft of the manuscript. JM and PC implemented the use of persistence  
22 homology. All authors contributed to the revising and editing of the manuscript and approved  
23 its submission.

24

25

26 **Abstract**

27 Animals regulate their diet in order to maximise the expression of fitness traits that often  
28 have different nutritional needs. These nutritional trade-offs have been experimentally  
29 uncovered using the Geometric framework for nutrition (GF). However, current analytical  
30 methods to measure such responses rely on either visual inspection or complex models  
31 applied to multidimensional performance landscapes, making these approaches subjective, or  
32 conceptually difficult, computationally expensive, and in some cases inaccurate. This limits  
33 our ability to understand how animal nutrition evolved to support life-histories within and  
34 between species. Here, we introduce a simple trigonometric model to measure nutritional  
35 trade-offs in multidimensional landscapes ('Nutrignonometry'). Nutrignonometry is both  
36 conceptually and computationally easier than current approaches, as it harnesses the  
37 trigonometric relationships of right-angle triangles instead of vector calculations. Using  
38 landmark GF datasets, we first show how polynomial (Bayesian) regressions can be used for  
39 precise and accurate predictions of peaks and valleys in performance landscapes, irrespective  
40 of the underlying structure of the data (i.e., individual food intakes *vs* fixed diet ratios). Using  
41 trigonometric relationships, we then identified the known nutritional trade-off between  
42 lifespan and reproductive rate both in terms of nutrient balance and concentration.  
43 Nutrignonometry enables a fast, reliable and reproducible quantification of nutritional trade-  
44 offs in multidimensional performance landscapes, thereby broadening the potential for future  
45 developments in comparative research on the evolution of animal nutrition.

46

47

48

## 49 **Introduction**

50 Animals often require different nutrient blends to maximize concurrent life-history traits,  
51 creating the potential for a conflict between nutrient allocation (Simpson and Raubenheimer  
52 2012; Raubenheimer and Simpson 2020). When the optimum nutrition for several traits  
53 cannot be achieved simultaneously, a compromise in feeding decisions must exist in order to  
54 support the expression of one trait over another ('nutritional trade-off') (Lee et al. 2008;  
55 Maklakov et al. 2008). Previous research has identified nutritional trade-offs between  
56 lifespan and reproduction or between immunity and reproduction across many different taxa  
57 including *D. melanogaster* (Lee et al. 2008; Ponton et al. 2015), tephritid fruit flies (Fanson  
58 and Taylor 2012; Fanson et al. 2012), crickets (Maklakov et al. 2008; Rapkin et al. 2018; Guo  
59 et al. 2021; Treidel et al. 2021) and mice (Solon-Biet et al. 2014) [see also reviews by  
60 (Ponton et al. 2011; Schwenke et al. 2016)]. Even traits related to different aspects of the  
61 same life-history can vary in nutritional requirements during the lifetime of an animal, as  
62 seen for pre- and post-mating traits related to reproduction of many insect species such as  
63 sperm number and viability (Bunning et al. 2015), fertilization success across sperm  
64 competitive contexts (Morimoto and Wigby 2016), cuticular hydrocarbons, courtship song  
65 and sperm viability (Ng et al. 2018) as well as size and numbers of eupyrene and apyrene  
66 sperms (Gage and Cook 1994). Thus, nutritional trade-offs are likely ubiquitous and impose  
67 significant constraints on the feeding behaviour of individuals.

68

69 Measuring nutritional trade-offs can be challenging because of the interactive effects of  
70 nutrient ratios and concentrations on the expression of life-histories (Stearns 1992; Roff  
71 2002; Hunt et al. 2004; Simpson and Raubenheimer 2012). In the last decades, however, a  
72 method known as Geometric Framework of Nutrition (GF) has emerged as a powerful  
73 unifying framework capable of disentangling the multidimensional effects of nutrients (both

74 ratios and concentrations) on life-history traits and fitness (Simpson and Raubenheimer  
75 1993a). The GF has been applied to a diverse range of nutritional studies across species such  
76 as flies (Lee et al. 2008; Reddiex et al. 2013; Jensen et al. 2015; Ponton et al. 2015;  
77 Morimoto and Wigby 2016; Kutz et al. 2019) (Fanson and Taylor 2012; Fanson et al. 2012)  
78 (Barragan-Fonseca et al. 2018, 2021), crickets (Ng et al. 2018) (Rapkin et al. 2018)  
79 (Maklakov et al. 2008), cockroaches (Bunning et al. 2015), domestic cats and dogs (Hewson-  
80 Hughes et al. 2011, 2013), and mice (Solon-Biet et al. 2014; Morimoto et al. 2019), being  
81 paramount for advancing our understanding of complex physiological and behavioural  
82 processes across ecological environments and even human health (Simpson et al. 2017). As a  
83 result, developing a simple, intuitive, and accurate quantitative method for quantifying  
84 nutritional trade-offs has become a key issue for comparative nutrition, which will allow new  
85 avenues of research for insights into the evolution of physiological and behavioural  
86 modulation of nutritional responses (Morimoto and Lihoreau 2020).

87

88 Recent initiatives have been made but these are complex to navigate and therefore studies  
89 continue to be published with visual inspection or with inaccurate methods to quantify the  
90 strength of nutritional trade-offs in GF landscapes [e.g., (Polak et al. 2017; Ng et al. 2018,  
91 2019; Kutz et al. 2019; Ma et al. 2020; Barragan-Fonseca et al. 2021)]. Why is it so difficult  
92 to measure nutritional trade-offs in GF multidimensional fitness landscapes? The  
93 fundamental limitation in all models so far is identifying and delimitating the region of  
94 interest (i.e., peaks and, to a lesser extent, valleys) for comparisons of distances between  
95 peaks of different traits (or same trait between species). For instance, (Rapkin et al. 2018)  
96 proposed the use of regression slopes (rather than the coordinates of the optimum) nutrients  
97 onto the fitness trait  $i$  as coordinates of a vector  $\vec{v}_i$ . From this, the angle  $\theta'$  between vectors  $\vec{v}_i$   
98 and  $\vec{v}_j$  for traits  $i$  and  $j$ , respectively, can be calculated as the estimate of the strength of the

99 nutritional trade-off. However, in this approach, the domain of each vector coordinate is all  
100 real numbers  $\mathbb{R}$  even though the domain of the fitness landscape is constrained to all positive  
101 real numbers  $\mathbb{R}^+$ . Consequently, this violates the domain constraints of the nutritional space  
102 upon which GF is performed, which in turn result in overestimation of the strength of  
103 nutritional trade-offs (Morimoto and Lihoreau 2019). To address this limitation, we proposed  
104 to use the coordinates of the peak (or valley) from the nutritional space as vector coordinates  
105 for the position vector  $\vec{v}_i$ , from which the angle  $\theta$  between position vectors  $\vec{v}_i$  and  $\vec{v}_j$  for traits  
106  $i$  and  $j$ , respectively, can be estimated as measure of the strength of the nutritional trade-off.  
107 This overcomes the violation of domains between vector coordinates and the nutritional  
108 space [in (Rapkin et al. 2018)] and therefore ensures that the estimate of  $\theta$  is calculated in the  
109 same domain of the GF fitness landscapes. However, this Vector of Positions approach relies  
110 on the peak estimates from a SVM machine learning model which is computationally  
111 expensive particularly in  $n$  dimensions, where  $n > 3$ , and sensitive to the characteristics of the  
112 input data (e.g., if the data contains food intakes as in (Lee et al. 2008; House et al. 2015;  
113 Jensen et al. 2015; Morimoto and Lihoreau 2019) or a grid of fixed diet ratios as in (Kutz et  
114 al. 2019)], identifying local as well as global peaks that introduce noise into the analysis  
115 (shown here). Albeit useful, the Vector of Positions approach can be cumbersome to  
116 implement across different datasets, computationally expensive to obtain estimates of peaks  
117 (or valleys), and as a result can generate inaccurate estimates of the strength of nutritional  
118 trade-offs. Thus, to date, there are no proposed solutions that address the above limitations,  
119 which creates a significant bottleneck in studies of nutrition that limits the multidimensional  
120 power of the GF framework.

121

122 Here, we address the limitations of current models by proposing a simpler framework  
123 (Nutrignometry) upon which the strength of nutritional trade-offs can be calculated in 3D

124 fitness landscapes, irrespective of the structure of the nutritional data to analyze. Using  
125 landmark GF datasets, we first investigated the performance of different ‘off-the-shelf’  
126 machine learning models in predicting the peak in the fitness landscapes, in order to find the  
127 most accurate and computationally inexpensive model. We achieved this by integrating  
128 several measurements of predictive error, variance in predicted peak area, and topological  
129 characteristics of the predicted peak region. Next, we used simple trigonometric functions  
130 and relationships to estimate the strength of nutritional trade-offs both in terms of nutrient  
131 balance as well as nutrient concentration, or both. Our approach opens new avenues of  
132 research in multidimensional nutrition, and allows for physiological and comparative studies  
133 to be performed in a consistent and reproducible way from which insights onto the evolution  
134 of animal nutrition can be gained across the tree of life.

135

## 136 **Material and Methods**

### 137 *Nutrigonometry*

138 Studies using GF define the food components (typically macro-nutrients) that will be  
139 investigated, which together compose the ‘nutritional space’. For example, in studies where  
140 protein and carbohydrate effects are investigated, there is a 2D nutritional space (one  
141 dimension for each nutrient) onto which the performance landscape of the trait is mapped.  
142 This rationale can be extended to  $n$  number of nutrients (Simpson and Raubenheimer 1993*b*),  
143 albeit to date, studies with two nutrients are the most common (Morimoto and Lihoreau  
144 2020). If we consider this 2D nutritional space as a rectangular space in which an infinite  
145 number of nutritional rails (i.e., imaginary lines that pass through the origin with arbitrary  
146 positive slope) exist that divides the space in right-angle triangles, then it is possible to use  
147 simple trigonometric functions to estimate the angle  $\alpha_i$  and the hypotenuse of the triangle,  
148 for all fitness traits mapped onto the nutritional space. The angle  $\alpha_i$  is the angle of the

149 nutritional rail, relative from the x-axis, that passes through the peak in the landscape for the  
150 trait  $i$ , and the hypotenuse  $h_i$  of the triangle shows how far from the origin the peak in the  
151 landscape sits for the trait  $i$  (Fig 1a).  $\alpha_i$  and  $h_i$  can be calculated using Pythagorean theorem  
152 and the relationship between the angle and the sides of right-angle triangles (i.e., sines and  
153 cosines), as shown in Fig 1a.

154

155 Once  $\alpha_i$  are known, we can estimate the angle  $\theta$  [as in (Morimoto and Lihoreau 2019)] which  
156 is the difference in the angle between nutritional rails that maximize two traits,  $i$  and  $j$ , and  
157 provides a measure of the strength of the nutritional trade-off that exists between traits  $i$  and  $j$   
158 (Fig 1b). The larger the angle  $\theta_{i,j}$ , the strongest the nutritional trade-off in terms of nutrient  
159 balance (and potentially nutritional compromise) between traits. Likewise, we can compare  
160 the difference  $h_{i,j}$  in the estimates of the hypotenuse  $h_j$  and  $h_i$  to quantify nutritional trade-  
161 offs in relation to nutrient concentration (Fig 1b). These metrics allowed us to disentangle the  
162 following scenarios in which nutritional trade-off can occur:

163 (I) When  $\theta_{i,j}$  is large but  $h_{i,j}$  is small ('Strong nutritional trade-off in terms of  
164 nutrient balance')

165 (II) When  $\theta_{i,j}$  is small but  $h_{i,j}$  is large ('Strong nutritional trade-off in terms of  
166 nutrient concentration'),

167 (III) When  $\theta_{i,j}$  and  $h_{i,j}$  are large ('Strong nutritional trade-off in terms of both  
168 nutrient balance and concentration')

169 (IV) When  $\theta_{i,j}$  and  $h_{i,j}$  are small ('Weak or no nutritional trade-off') (Fig 1c).

170

171 Here when applying this model for empirical datasets (see below), inferences on the strength  
172 of nutritional trade-offs were made using confidence intervals for  $h_{i,j}$  and  $\theta_{i,j}$ , whereby  
173 nutritional trade-offs were stronger when confidence intervals did not overlap zero and the

174 magnitude of the difference was large. Estimates are presented in the units of the nutrient  
175 space in which the data was collected (e.g., mg), while angles are presented in degrees.  
176 Confidence intervals for both  $h_{i,j}$  and  $\theta_{i,j}$  were calculated using the significance threshold of  
177 0.05 and the quartiles of a  $t$ -distribution. All analyses and plots were done in R version 3.6.2  
178 (R Core Team 2019).

179

### 180 ***Predicting peak (or valley) location and size***

181 As with previous approaches, the model presented here depends on accurate estimates of the  
182 coordinates for the peak in the multidimensional performance landscape. Without this,  
183 estimates of  $h_{i,j}$  and  $\theta$  are inaccurate which in turn affects the ability of the model to estimate  
184 the strength of nutritional trade-offs. To overcome this, the basic algorithms underpinning the  
185 identification of peak regions in multidimensional fitness landscapes were designed as  
186 following:

- 187 1) Empirical data was split into training (75%) and test (25%) datasets;
- 188 2) A machine learning model was fitted to the training set using 10-fold cross-validation,  
189 with the fitness trait as dependent variable and the nutrient intakes (or fixed ratios) as  
190 independent variables. The model included main and interactive effects of protein and  
191 carbohydrate, as well as quadratic effects of each nutrient (for non-linear  
192 relationships);
- 193 3) The model's predictive performance was evaluated with root-mean-square-error  
194 (RMSE) with respect to the observed values of the test dataset;
- 195 4) A set of 500 random points corresponding to (protein, carbohydrate) coordinates were  
196 generated covering the nutritional space, and the model of step 2 was used to predict  
197 the value of the fitness value for each point;



198        5) A quantile threshold was used to crop the data to the specific region of interest. For  
199        instance, for peaks in the nutritional landscape, the default value used throughout this  
200        study was set to 0.95 (i.e., the highest 5% predicted fitness values are subset, from  
201        which coordinates of protein and carbohydrate are used).

202        6) Steps 4-5 were repeated 100 times.

203        We then made statistical inferences on peak area from 95% confidence intervals using the ‘ci’  
204        function of the ‘Rmisc’ package (Hope et al. 2013) whereby we resampled with replacement  
205        the selected random points obtained from steps 5 and 6 above. To test the performance of  
206        nutrigonometry in estimating nutritional trade-offs, we used the most commonly used models  
207        to test relationships between traits in behavioral ecology (e.g., general linear model), machine  
208        learning models used in regression models in ecology and evolution [e.g., Random Forest,  
209        (Rabinovich 2021)], as well as models that have been specifically used to analyse  
210        multidimensional performance landscapes in GF studies (e.g., SVM, GAMs) (Ponton et al.  
211        2015; Morimoto and Lihoreau 2019). In particular, we tested the performance of Bayesian  
212        linear regression (Bayes), general linear regression (LM), k-nearest neighbors (KNN),  
213        Gradient boost (GBoost), random forest (RF), support vector machine (SVM) with radial  
214        basis function as well as generalized additive models (GAMs) with both smooth term or  
215        tensor product term. With the exception of GAMs that were fitted using the ‘mgcv’ package  
216        (Wood and Wood 2015), all other models were fitted using the ‘tidymodels’ package of the  
217        tidyverse (Wickham et al. 2019). For the Bayesian regression, we used the flexible Cauchy  
218        prior from the ‘rstanarm’ package for all analysis (Goodrich et al. 2020). Fitness landscapes  
219        were estimated using the ‘Tps’ function of the ‘fields’ package (Nychka et al. 2017). All plots  
220        were done using the ‘ggplot2’ package (Wickham 2016). All models were fitted to a training  
221        set (75% of the data) and model performance (i.e., RMSE) was calculated from the  
222        performance of the models in the remaining test dataset (25%).

223

224 ***Goodness-of-estimate of the models***

225 In addition to RSME, we estimated the area (in squared units in which the data is collected)  
226 of the polygon delimited by the estimated predicted peak region ('Area') and the horizontal  
227 (protein) and vertical (carbohydrate) spread of the datapoints of the predicted peak region  
228 ('Nutrient spread') as proxies of the goodness-of-estimate of the models (Fig 1d). The smaller  
229 the RMSE, the better is the model in predicting the fitness value of the peak region (the z-  
230 axis). Furthermore, the smaller the area and nutrient spread, the more compact the prediction  
231 of the peak region in the nutritional space. Note that RMSE values do not interfere with  
232 accuracy of estimates of  $h_{i,j}$  and  $\theta$ , and thus the estimates of nutritional trade-offs, because  
233 the z-axis is not used in the calculation of angles and hypotenuses (Fig 1d). A model can  
234 have high RMSE and still be the best predictive model as long as the predicted peak correctly  
235 matches with the observed peak in the landscape.

236

237 ***Topological structure of the estimated peak***

238 Even in cases where area and nutrient spread of the predicted peak region are small, it is  
239 important to have evenly-spaced datapoints within the predicted peak region. This is because  
240 predictions of regions which contain holes can lead to mis-estimation of the strength of  
241 nutritional trade-offs by potentially adding noise to the set of protein and carbohydrate  
242 coordinates used to calculate  $h_{i,j}$  and  $\theta$ . We measured the topological structure of the  
243 predicted peak region using the concept of persistence homology (PH), which in simple  
244 terms, allows us to investigate the overall structural organisation of the data [see Text S1 and  
245 (Zomorodian and Carlsson 2005; Weinberger 2011) for details of the concept] (Fig 1d). PH  
246 was estimated using the 'TDAstats' package (Wadhwa et al. 2018). Together, the estimates of

247 RMSE, area, nutrient spread, and PH provided a comprehensive suite of metrics to assess the  
248 quality of model predictions for the peak region in fitness landscapes.

249

### 250 *Datasets used for model application*

251 We demonstrate the applications of the Nutrignonometry framework using two datasets, which  
252 vary in structure. The first dataset is a landmark dataset which contains *Drosophila*  
253 *melanogaster* individual adult nutrient intake as well as the consequences of nutrient intake to  
254 lifespan and reproduction (Lee et al. 2008). This dataset was previously used to test the  
255 Vector of Position approach and therefore has important benchmark status in the field  
256 (Morimoto and Lihoreau 2019). We also investigate the effect of data structure on  
257 Nutrignonometry estimates of peak and valley regions. In GF, data can be divided into two  
258 structures: intake data and fixed ratio data. Intake data is ideal in GF studies because it allows  
259 for exploration of *realized* nutritional effects, that is, nutritional effects exerted upon traits  
260 given by the amount of nutrient eaten (Simpson and Raubenheimer 1993*b*). However,  
261 collecting intake data can be cumbersome or challenging, and recent approaches have  
262 adapted GF experiments to draw landscapes of traits based on the fixed ratio of the nutrients  
263 in the diets (Kutz et al. 2019). To date, however, we still do not know how this adaptation  
264 influence estimates of nutritional trade-offs in multidimensional performance landscapes.  
265 Here, to test whether the structure of the data is important for model predictions, we used Lee  
266 et al., (2008) dataset with individual intakes ('intakes') as well as with fixed ratios ('fixed').  
267 Using this data and for the purpose of the demonstration of Nutrignonometry, we estimated the  
268 nutritional trade-off between lifespan and reproductive rate which are known to trade-off in  
269 this species. We also used a second dataset from (Kutz et al. 2019), which studied how  
270 temperature modulates nutritional responses of larval development and adult fitness in *D.*  
271 *melanogaster*, as an additional proof-of-application of our model in fixed ratio datasets (see

272 Fig S1). Lastly, we demonstrated how the best performing models in our peak analysis can be  
273 used to predict valley regions (Fig S2 and Fig S3).

274

### 275 *Comparison with intake target*

276 *Drosophila melanogaster* balance their nutrient intake to a P:C ratio of 1:4 when given the  
277 possibility to self-select multiple nutritionally complementary foods (Lee et al. 2008). We  
278 then used the peak predictions of the Nutrigonometry framework to test whether the observed  
279 P:C ratios that maximized lifespan and reproductive rates coincided with the P:C ratio of 1:4  
280 reached by flies in choice situations. To achieve this, we calculated the 95% confidence  
281 interval as described for the peak area but in this case, for the P:C ratio of each trait.  
282 Whenever the confidence interval overlapped 1:4, we inferred that the estimate of peak ratio  
283 did not statistically differ from the intake target of 1:4.

284

## 285 **Results**

### 286 *Simple (Bayesian) linear regressions outshine machine learning models when predicting* 287 *peak region in multidimensional landscapes*

288 All models generated predictions of peak region in nutritional landscapes irrespective of data  
289 structure although the accuracy and topology of the predicted regions varied (Fig 2 and Fig  
290 3). In general, GAMs with tensor product and smooth function as well as Bayes and LM  
291 linear models generated peak predictions for both lifespan and reproductive rate that were  
292 significantly more accurate (narrower in area) than other models when the structure of the  
293 data was composed of food intakes (Fig 2, Table S1 and Table S2). When the data structure  
294 changed to fixed ratios, LM, GAM with tensor product, Bayes, and KNN predicted peaks  
295 with smaller area for lifespan and all but KNN perform within similar scales for the peak  
296 prediction of reproductive rate (Fig 2, Table S1 and Table S2). In comparison, GAM smooth

297 did not perform well in predicting peak region that was homogenous and accurate to the  
298 performance landscape, particularly when the data structure was fixed ratio. The performance  
299 of the models was independent of patterns in the estimates of RMSE and nutrient spread  
300 which showed no clear pattern of performance with the exception of LM and Bayes that  
301 displayed consistently lower spread when the structure of the data were intakes (Fig 3 and Fig  
302 4; Table S2). Interestingly, machine learning models consistently underperformed, predicting  
303 peak regions that were wider and less accurate and homogenous (Fig 2 and 3, Table S1 and  
304 S2). The underlying reason for this is unclear, but similar patterns were observed when  
305 predicting the peak region of (Kutz et al. 2019) dataset (see Fig S1 and Table S3). Bayes,  
306 GAMs (both smooth and tensor product) and LM also performed well when predicting valley  
307 regions (see Fig S2 and S3). These results indicate that simple (Bayesian) linear regression  
308 provide consistently the best models to estimate the region of the peak of fitness landscapes  
309 irrespective of the structure of the data, and that GAMs with tensor product (and to a smaller  
310 extent, smooth function) can be used when the data are individual intakes.

311

312 ***Better models lead to accurate estimates of known nutritional trade-offs in***  
313 ***multidimensional landscapes***

314 GAMs (both smooth and tensor product), Bayes, LM, and KNN models were the only models  
315 that correctly identified the nutritional trade-off measured by  $\theta$  between lifespan and  
316 reproductive rate for data with individual intakes (Table 1). Given the variability in the area,  
317 spread, and topology of the predicted region, estimates of  $h_{i,j}$  and  $\theta$  were more accurate  
318 (narrower confidence intervals) for GAMs (smooth and tensor product), Bayes and LM  
319 compared with KNN. GAMs, Bayes and LM were the only ones that identified a trade-off on  
320 the hypotenuse estimate  $h_{i,j}$  for data of individual intakes, while KNN was the only model  
321 that identified this trade-off in data with fixed ratio. GAM smooth was the only model that

322 failed to identify this trade-off when the data was composed of fixed ratios (Table 1). Thus,  
323 overall, simpler models are more suitable to generate peak predictions that accurately  
324 describe nutritional trade-offs in multidimensional performance landscapes for data of  
325 different structures.

326

### 327 *Comparing trait optimum with intake target*

328 We then used the estimated peak regions for lifespan and reproductive rate (both individual  
329 intake and fixed ratio data structures) to estimate the optimum P:C ratio that maximises each  
330 trait as well as whether or not these optima coincided with the P:C ratio obtained when  
331 individuals are allowed to balance their diet (i.e., 1:4). All models predicted a significantly  
332 lower P:C ratio for the optimum that maximizes reproductive rate relative to lifespan as  
333 expected from the original visual comparison of landscapes (around 1:2 for reproductive rate  
334 and >1:9 for lifespan) (Table 2). However, none of the estimates overlapped 1:4, suggesting  
335 that *D. melanogaster* females likely have to compromise the nutrient intake to maximise  
336 either lifespan or reproductive rate, but not both simultaneously.

337

### 338 **Discussion**

339 We proposed a new simple analytical framework to analyse nutritional trade-offs in  
340 multidimensional fitness landscapes. Nutrigonometry uses trigonometric relationships from  
341 right-angle triangles to identify and compare peaks (or valleys) in 3D fitness landscapes  
342 between traits. Using landmark GF datasets with different structures, we demonstrated the  
343 accuracy and performance of standard (machine learning) models in finding the peak regions  
344 in these multidimensional landscapes and subsequently quantifying the strength of nutritional  
345 trade-offs between traits. As with the Vector of Positions approach (Morimoto and Lihoreau  
346 2019), the Nutrigonometry strictly considers coordinates in the real positive region of the

347 nutrient space, whereby the true separation between key regions (peaks and valleys) are  
348 quantified within the correct domain in which the fitness landscapes exist. However, contrary  
349 to previous methods (Rapkin et al. 2018; Morimoto and Lihoreau 2019), the Nutrigonometry  
350 does not rely on vector calculations but instead harnesses the trigonometric relationships of  
351 right-angle triangles to estimate nutritional trade-offs. This is a major advance of the model  
352 as it considerably simplifies the framework both in conceptual and computational terms.  
353 Nutrigonometry thus significantly advances our ability to generate reliable and reproducible  
354 estimates of nutritional trade-offs within and between species, facilitating quantitative  
355 (comparative studies) of animal nutrition.

356

357 Multidimensional studies of nutrition through the GF have been increasingly used to gain  
358 insight into animal and human nutrition (Lee et al. 2008; Behmer 2009; Felton et al. 2009;  
359 Simpson and Raubenheimer 2012; Hewson-Hughes et al. 2013; Gosby et al. 2014; Solon-  
360 Biet et al. 2014). Likewise, the complexity of the applications has also increased, ranging  
361 from studies with few nutrients (e.g., protein and carbohydrates, salts) through to high-  
362 dimensional studies investigating individual fatty acids and amino acids (Simpson et al. 2006;  
363 Grandison et al. 2009; Arien et al. 2015; Arganda et al. 2017; Piper et al. 2017). This means  
364 that analytical frameworks that are simple and robust must be developed to support the  
365 development of the field. Nutrigonometry provides such foundation, by demonstrating the  
366 best approach to investigate nutritional trade-offs in 3D fitness landscapes. Because  
367 Nutrigonometry uses trigonometric relationships of right-angle triangle, it is applicable to  $n$   
368 dimensions. However, given the often counter-intuitive geometrical effects of high  
369 dimensionality [e.g., (Milman 1998; Watanabe 2021)], such expansion to higher dimensions  
370 requires further investigation as the topic of future developments. Nevertheless, given the  
371 broad use of 3D fitness landscapes in GF studies (Morimoto and Lihoreau 2020),

372 Nutrigonometry readily enables important quantifications of nutritional trade-offs that were  
373 otherwise absent or cumbersome to produce. For instance, using a range of models,  
374 Nutrigonometry uses right-angle triangles to compare the ratio of nutrients that maximise  
375 lifespan and reproductive rate along with the strength of nutritional trade-offs between these  
376 traits in a landmark paper in the field (Lee et al. 2008). Moreover, Nutrigonometry is capable  
377 of comparing the nutrient ratio which maximises lifespan and reproductive rate with the  
378 nutrient ratio that is balanced by individuals when given a choice, providing important  
379 insights into the dietary choices underpinning nutritional compromises. Such quantification  
380 can bring new fundamental insights into our understanding of nutritional trade-offs such as  
381 strength and the direction of the trade-offs (e.g. nutrient balance vs concentration, see Fig. 1),  
382 as well as how much animals actually resolve these trade-offs when they have the opportunity  
383 to do so and whether, for instance, they favour one trait of another (distance between optimal  
384 trade-off and observed nutrient intake target, see Table 2).

385

386 An important trend in the field of multidimensional nutrition is the study of nutritional effects  
387 across physiological pathways and across levels of biological organization (Lihoreau et al.  
388 2014; Simpson et al. 2015). These studies generate multiple 3D landscapes that are often  
389 compared visually, without rigorous analytical methods to measure nutritional trade-offs. For  
390 example, eleven 3D-landscapes of the expression of genes involved in the Insulin/IGF  
391 pathway were visually compared to provide insights into how a key endocrine pathway is  
392 regulated based on nutrient intake, and how gene expression can underlie expression of life-  
393 histories (Post and Tatar 2016; McDonald et al. 2021). Likewise, twelve 3D-landscapes with  
394 gut microbial diversity or abundance were visually compared to better understand how  
395 nutrient composition can modulate host-microbe interactions (Ng et al. 2019). Similar visual  
396 comparisons have been made to understand the effects of nutrition on host-endosymbiont



397 relationship (Ponton et al. 2015). The analytical framework proposed here will allow  
398 researchers to move beyond visual comparisons to quantitatively assess how landscapes  
399 differ using a rigorous and reproducible framework. As a result, Nutrigonometry yields  
400 considerable advances to the status quo in the field, enabling a deeper understanding of the  
401 role of nutrition in host-microbial interactions as well as animal physiology, behaviour and  
402 ecology.

403

#### 404 **Acknowledgements**

405 ML receives support from the CNRS, the French Research Agency (ANR 3DNavibee: ANR-  
406 19-CE37-0024), the European Regional Development Fund (FEDER ECONECT:  
407 MP0021763), and the European Research Council (ERC-CoG BEE-MOVE: GA101002644).

408

#### 409 **Data accessibility**

410 Kutz et al. data is available here: [doi.org/10.26180/5cfe1ddaaafac](https://doi.org/10.26180/5cfe1ddaaafac). Lee et al. dataset is  
411 available in Dryad: [doi:10.5061/dryad.tp7519s](https://doi.org/10.5061/dryad.tp7519s). R script with functions for the  
412 implementation of the Nutrigonometry framework is available in the Supplementary  
413 Materials.

414

#### 415 **References**

416 Arganda, S., S. Bouchebti, S. Bazazi, S. Le Hesran, C. Puga, G. Latil, S. J. Simpson, et al.  
417 2017. Parsing the life-shortening effects of dietary protein: effects of individual amino acids.  
418 Proceedings of the Royal Society B: Biological Sciences 284:20162052.  
419 Arien, Y., A. Dag, S. Zarchin, T. Masci, and S. Shafir. 2015. Omega-3 deficiency impairs  
420 honey bee learning. Proceedings of the National Academy of Sciences of the United States of  
421 America 112:15761–15766.

422 Barragan-Fonseca, K. B., M. Dicke, and J. J. A. van Loon. 2018. Influence of larval density  
423 and dietary nutrient concentration on performance, body protein, and fat contents of black  
424 soldier fly larvae (*Hermetia illucens*). *Entomologia Experimentalis et Applicata* 166:761–  
425 770.

426 Barragan-Fonseca, K. B., G. Gort, M. Dicke, and J. J. A. van Loon. 2021. Nutritional  
427 plasticity of the black soldier fly (*Hermetia illucens*) in response to artificial diets varying in  
428 protein and carbohydrate concentrations. *Journal of Insects as Food and Feed* 7:51–61.

429 Behmer, S. T. 2009. Insect herbivore nutrient regulation. *Annual Review of Entomology*  
430 54:165–187.

431 Bunning, H., J. Rapkin, L. Belcher, C. R. Archer, K. Jensen, and J. Hunt. 2015. Protein and  
432 carbohydrate intake influence sperm number and fertility in male cockroaches, but not sperm  
433 viability. *Proceedings of the Royal Society B: Biological Sciences* 282:20142144.

434 del Castillo, E., P. Chen, A. Meyers, J. Hunt, and J. Rapkin. 2020. Confidence regions for the  
435 location of response surface optima: the R package OptimaRegion. *Communications in*  
436 *Statistics-Simulation and Computation* 1–21.

437 del Castillo, E., J. Hunt, and J. Rapkin. 2016. OptimaRegion: confidence regions for Optima.  
438 R package version 0.2.

439 Fanson, B. G., and P. W. Taylor. 2012. Protein:carbohydrate ratios explain life span patterns  
440 found in Queensland fruit fly on diets varying in yeast:sugar ratios. *Age (Dordr)* 34:1361–  
441 1368.

442 Fanson, B. G., S. Yap, and P. W. Taylor. 2012. Geometry of compensatory feeding and water  
443 consumption in *Drosophila melanogaster*. *Journal of Experimental Biology* 215:766–773.

444 Felton, A. M., A. Felton, D. Raubenheimer, S. J. Simpson, W. J. Foley, J. T. Wood, I. R.  
445 Wallis, et al. 2009. Protein content of diets dictates the daily energy intake of a free-ranging  
446 primate. *Behavioral Ecology*. 20:685-690

- 447 Gage, M. J. G., and P. A. Cook. 1994. Sperm size or numbers - Effects of nutritional stress  
448 upon eupyrene and apyrene sperm production strategies in the moth *Plodia-Interpunctella*  
449 (Lepidoptera, Pyralidae). *Functional Ecology* 8:594–599.
- 450 Goodrich, B., J. Gabry, I. Ali, and S. Brilleman. 2020. rstanarm: Bayesian Applied  
451 Regression Modeling via Stan. R Package v. 2.19. 2.
- 452 Gosby, A. K., A. D. Conigrave, D. Raubenheimer, and S. J. Simpson. 2014. Protein leverage  
453 and energy intake. *Obesity Reviews* 15:183–191.
- 454 Grandison, R. C., M. D. W. Piper, and L. Partridge. 2009. Amino-acid imbalance explains  
455 extension of lifespan by dietary restriction in *Drosophila*. *Nature* 462:1061–1064.
- 456 Guo, J., Y. Cui, P. Lin, B. Zhai, Z. Lu, J. W. Chapman, and G. Hu. 2021. Male nutritional  
457 status does not impact the reproductive potential of female *Cnaphalocrocis medinalis* moths  
458 under conditions of nutrient shortage. *Insect Science*. doi.org/10.1111/1744-7917.12939
- 459 Hewson-Hughes, A. K., V. L. Hewson-Hughes, A. Colyer, A. T. Miller, S. J. McGrane, S. R.  
460 Hall, R. F. Butterwick, et al. 2013. Geometric analysis of macronutrient selection in breeds of  
461 the domestic dog, *Canis lupus familiaris*. *Behavioral Ecology* 24:293–304.
- 462 Hewson-Hughes, A. K., V. L. Hewson-Hughes, A. T. Miller, S. R. Hall, S. J. Simpson, and  
463 D. Raubenheimer. 2011. Geometric analysis of macronutrient selection in the adult domestic  
464 cat, *felis catus*. *Journal of Experimental Biology* 214:1039–1041.
- 465 Hope, R. M., M. R. M. Hope, and R. Collate'CI. 2013. Package 'Rmisc.' group 101:2.
- 466 House, C. M., K. Jensen, J. Rapkin, S. Lane, K. Okada, D. J. Hosken, and J. Hunt. 2015.  
467 Macronutrient balance mediates the growth of sexually selected weapons but not genitalia in  
468 male broad-horned beetles. *Functional Ecology*. 30:769-779
- 469 Hunt, J., R. Brooks, M. D. Jennions, M. J. Smith, C. L. Bentsen, and L. F. Bussiere. 2004.  
470 High-quality male field crickets invest heavily in sexual display but die young. *Nature*  
471 432:1024–1027.

- 472 Jensen, K., C. McClure, N. K. Priest, and J. Hunt. 2015. Sex-specific effects of protein and  
473 carbohydrate intake on reproduction but not lifespan in *Drosophila melanogaster*. *Aging Cell*  
474 14:605-615
- 475 Kutz, T. C., C. M. Sgrò, and C. K. Mirth. 2019. Interacting with change: Diet mediates how  
476 larvae respond to their thermal environment. *Functional Ecology* 33:1940–1951.
- 477 Lee, K. P., S. J. Simpson, F. J. Clissold, R. Brooks, J. W. Ballard, P. W. Taylor, N. Soran, et  
478 al. 2008. Lifespan and reproduction in *Drosophila*: New insights from nutritional geometry.  
479 *Proceedings of the National Academy of Sciences of the United States of America* 105:2498–  
480 2503.
- 481 Lihoreau, M., J. Buhl, M. A. Charleston, G. A. Sword, D. Raubenheimer, and S. J. Simpson.  
482 2014. Modelling nutrition across organizational levels: from individuals to superorganisms.  
483 *Journal of Insect Physiology* 69:2–11.
- 484 Ma, C., C. K. Mirth, M. D. Hall, and M. D. W. Piper. 2020. Amino acid quality modifies the  
485 quantitative availability of protein for reproduction in *Drosophila melanogaster*. *Journal of*  
486 *insect physiology* 104050.
- 487 Maklakov, A. A., S. J. Simpson, F. Zajitschek, M. D. Hall, J. Dessmann, F. Clissold, D.  
488 Raubenheimer, et al. 2008. Sex-specific fitness effects of nutrient intake on reproduction and  
489 lifespan. *Current Biology* 18:1062–1066.
- 490 McDonald, J. M. C., P. Nabili, L. Thorsen, S. Jeon, and A. W. Shingleton. 2021. Sex-specific  
491 plasticity and the nutritional geometry of insulin-signaling gene expression in *Drosophila*  
492 *melanogaster*. *EvoDevo* 12:1–17.
- 493 Milman, V. 1998. Surprising geometric phenomena in high-dimensional convexity theory.  
494 Pages 73–91 in *European Congress of Mathematics*. Springer.
- 495 Morimoto, J., and M. Lihoreau. 2019. Quantifying nutritional trade-offs across  
496 multidimensional performance landscapes. *The American Naturalist* 193:E168–E181.

- 497 ————. 2020. Open data for open questions in comparative nutrition. *Insects* 11:236.
- 498 Morimoto, J., A. Senior, K. Ruiz, J. A. Wali, T. Pulpitel, S. M. Solon-Biet, V. C. Cogger, et  
499 al. 2019. Sucrose and starch intake contribute to reduced alveolar bone height in a rodent  
500 model of naturally occurring periodontitis. *PLoS ONE* 14.
- 501 Morimoto, J., and S. Wigby. 2016. Differential effects of male nutrient balance on pre-and  
502 post-copulatory traits, and consequences for female reproduction in *Drosophila*  
503 *melanogaster*. *Scientific Reports* 6.
- 504 Ng, S. H., S. J. Simpson, and L. W. Simmons. 2018. Macronutrients and micronutrients drive  
505 trade-offs between male pre- and postmating sexual traits. *Functional Ecology* 32:2380–  
506 2394.
- 507 Ng, S. H., M. Stat, M. Bunce, S. J. Simpson, and L. W. Simmons. 2019. Protein and  
508 carbohydrate intakes alter gut microbial community structure in crickets: a Geometric  
509 Framework approach. *FEMS Microbiology Ecology* 95.
- 510 Nychka, D., F. Reinhard, J. Paige, and S. Sain. 2017. fields: Tools for spatial data. R package  
511 9.9.
- 512 Piper, M. D. W., G. A. Soultoukis, E. Blanc, A. Mesaros, S. L. Herbert, P. Juricic, X. He, et  
513 al. 2017. Matching dietary amino acid balance to the in silico-translated exome optimizes  
514 growth and reproduction without cost to lifespan. *Cell metabolism* 25:610–621.
- 515 Polak, M., L. W. Simmons, J. B. Benoit, K. Ruohonen, S. J. Simpson, and S. M. Solon-Biet.  
516 2017. Nutritional geometry of paternal effects on embryo mortality. *Proceedings of the Royal*  
517 *Society B: Biological Sciences* 284:20171492.
- 518 Ponton, F., K. Wilson, S. C. Cotter, D. Raubenheimer, and S. J. Simpson. 2011. Nutritional  
519 Immunology: A Multi-Dimensional Approach. *PLoS Pathogens* 7:e1002223.
- 520 Ponton, F., K. Wilson, A. Holmes, D. Raubenheimer, K. L. Robinson, and S. J. Simpson.  
521 2015. Macronutrients mediate the functional relationship between *Drosophila* and *Wolbachia*.

- 522 Proceedings of the Royal Society B-Biological Sciences 282:20142029.
- 523 Post, S., and M. Tatar. 2016. Nutritional geometric profiles of insulin/IGF expression in  
524 *Drosophila melanogaster*. *PloS one* 11:e0155628.
- 525 R Core Team. 2019. R: A language and environment for statistical computing. R Foundation  
526 for Statistical Computing.
- 527 Rabinovich, J. E. 2021. Morphology, life cycle, environmental factors and fitness-a machine  
528 learning analysis in kissing bugs (Hemiptera, Reduviidae, Triatominae). *Frontiers in Ecology*  
529 *and Evolution* 9:88.
- 530 Rapkin, J., K. Jensen, C. R. Archer, C. M. House, S. K. Sakaluk, E. Del Castillo, and J. Hunt.  
531 2018. The geometry of nutrient space-based life-history trade-offs: sex-specific effects of  
532 macronutrient intake on the trade-off between encapsulation ability and reproductive effort in  
533 decorated crickets. *The American Naturalist* 191:452–474.
- 534 Raubenheimer, D., and S. Simpson. 2020. *Eat Like the Animals: What Nature Teaches Us*  
535 *about the Science of Healthy Eating*. Houghton Mifflin.
- 536 Reddiex, A. J., T. P. Gosden, R. Bonduriansky, and S. F. Chenoweth. 2013. Sex-specific  
537 fitness consequences of nutrient intake and the evolvability of diet preferences. *The*  
538 *American Naturalist* 182:91–102.
- 539 Roff, D. A. 2002. *Life history evolution (Vol. 7)*. Sinauer Associates Sunderland.
- 540 Schwenke, R. A., B. P. Lazzaro, and M. F. Wolfner. 2016. Reproduction–Immunity Trade-  
541 Offs in Insects. *Annual Review of Entomology* 61:239–256.
- 542 Simpson, S. J., F. J. Clissold, M. Lihoreau, F. Ponton, S. M. Wilder, and D. Raubenheimer.  
543 2015. Recent advances in the integrative nutrition of Arthropods. *Annual Review of*  
544 *Entomology* 60:293–311.
- 545 Simpson, S. J., D. G. Le Couteur, D. E. James, J. George, J. E. Gunton, S. M. Solon-Biet, and  
546 D. Raubenheimer. 2017. The Geometric Framework for Nutrition as a tool in precision

547 medicine. *Nutrition and Healthy Aging* 4:217–226.

548 Simpson, S. J., and D. Raubenheimer. 1993*a*. A multi-level analysis of feeding behaviour:  
549 the geometry of nutritional decisions. *Philosophical Transactions of the Royal Society B-*  
550 *Biological Sciences* 342:381–402.

551 Simpson, S. J., and D. Raubenheimer. 1993*b*. A multi-level analysis of feeding behaviour:  
552 The geometry of nutritional decisions. *Philosophical Transactions of the Royal Society B:*  
553 *Biological Sciences* 342:381–402.

554 Simpson, S. J., and D. Raubenheimer. 2012. *The Nature of Nutrition: A Unifying Framework*  
555 *From Animal Adaptation to Human Obesity* (1st ed.). Princeton university press, Princeton,  
556 New Jersey.

557 Simpson, S. J., G. A. Sword, P. D. Lorch, and I. D. Couzin. 2006. Cannibal crickets on a  
558 forced march for protein and salt. *Proceedings of the National Academy of Sciences of the*  
559 *United States of America* 103:4152–4156.

560 Solon-Biet, S. M., A. C. McMahon, J. W. O. Ballard, K. Ruohonen, L. E. Wu, V. C. Cogger,  
561 A. Warren, et al. 2014. The ratio of macronutrients, not caloric intake, dictates  
562 cardiometabolic health, aging, and longevity in ad libitum-fed mice. *Cell Metabolism*  
563 19:418–430.

564 Stearns, S. C. 1992. *The evolution of life histories* (Vol. 249). Oxford University Press  
565 Oxford.

566 Treidel, L. A., R. M. Clark, M. T. Lopez, and C. M. Williams. 2021. Physiological demands  
567 and nutrient intake modulate a trade-off between dispersal and reproduction based on age and  
568 sex of field crickets. *Journal of Experimental Biology* 224:jeb237834.

569 Wadhwa, R. R., D. F. K. Williamson, A. Dhawan, and J. G. Scott. 2018. TDAstats: R  
570 pipeline for computing persistent homology in topological data analysis. *Journal of Open*  
571 *Source Software* 3:860.

572 Watanabe, J. 2021. Detecting (non)parallel evolution in multidimensional spaces: angles,  
573 correlations, and eigenanalysis. *EcoEvoRxiv* 1:25.

574 Weinberger, S. 2011. What is... persistent homology? *Notices of the AMS* 58:36–39.

575 Wickham, H. 2016. *ggplot2: elegant graphics for data analysis*. Springer.

576 Wickham, H., M. Averick, J. Bryan, W. Chang, L. D. McGowan, R. François, G. Grolemund,  
577 et al. 2019. Welcome to the Tidyverse. *Journal of Open Source Software* 4:1686.

578 Wood, S., and M. S. Wood. 2015. Package ‘mgcv.’ R package version 1:29.

579 Zomorodian, A., and G. Carlsson. 2005. Computing Persistent Homology. *Discrete &*  
580 *Computational Geometry* 33:249–274.

581

582



583 **Table caption**

584

585

586 **Table 1. Nutrigonometry quantification of nutritional trade-offs between lifespan and**  
587 **reproduction.** Estimates of  $\theta_{i,j}$  (in degrees) and  $h_{i,j}$  (in mg) for the nutritional trade-off  
588 between lifespan and reproductive rate. Analysis from the data presented in Lee et al. (2008).  
589 Confidence intervals overlapping zero implies no difference in the peaks. Magnitude of the  
590 estimates indicate the strength of nutritional trade-offs (i.e., larger magnitudes indicate  
591 stronger nutritional trade-offs). Note that  $\theta_{i,j}$  is bound between 0 and 90 degrees (i.e., 0 and  
592  $\frac{\pi}{2}$ ).

593

594

595 **Table 2. Nutrigonometry estimates of nutritional compromises.** Estimates of optimal  
596 intake that maximises lifespan and reproductive rate based on the predicted peak region.  
597 Comparison made with the visual peak ratio from Lee et al. (2008). Note that all models  
598 show that the estimated peak ratio between traits do not overlap and thus, corroborate the  
599 inference of a nutritional trade-off between traits, leading to a nutritional compromise. Note  
600 also that all but one model (i.e., GAM smooth for fixed ratio reproductive rate data) predicted  
601 peak region ~1:4, which is the ratio that individuals balance when given the ability to balance  
602 their diet ('choice'). All other models suggest that a P:C ratio of 1:4 is lower than the ratio  
603 needed to maximise lifespan but higher than that for reproductive rate, further supporting the  
604 concept of a nutritional compromise.

605

606

607

608

609

610

611 **Figure caption**

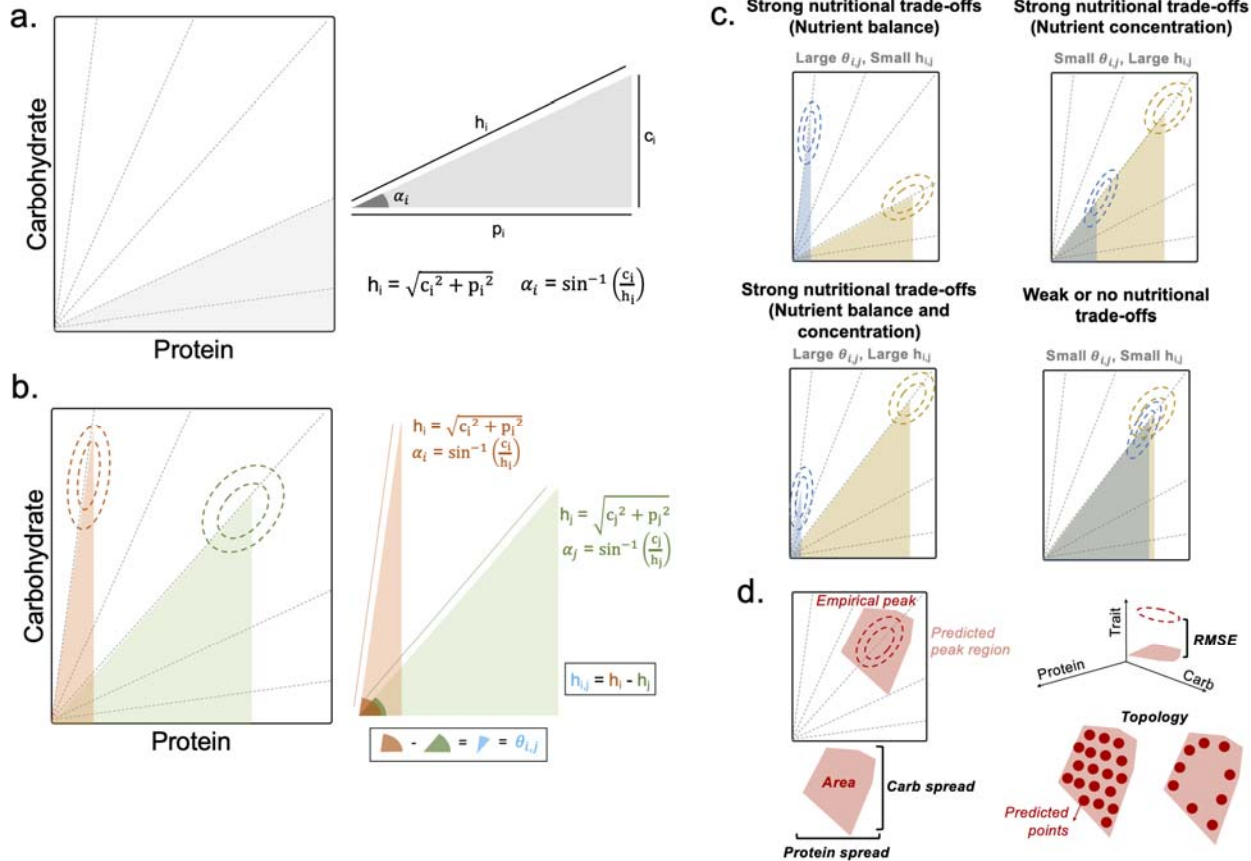

612 **Figure 1. Nutrignonometry framework.** (a) Considering an infinite number of nutritional  
 613 rails that divide the nutritional space into right-angle triangles, the angle and the  
 614 hypotenuse can be calculated from trigonometric relationships. (b) Nutrignonometry  
 615 applied to compare two traits is simple as it allows for the estimates of the strength of  
 616 nutritional trade-offs in terms of nutrient balance (angle) and nutrient concentration (the  
 617 difference, given in absolute terms). (c) Plausible scenarios for the estimates of  
 618 . (d) Metrics used to the peak prediction in the 3D landscape. RMSE was calculated as  
 619 root-mean-square difference between the predicted and observed values of the trait (z-axis) in  
 620 the peak region. Nutrient spread (both carbohydrate and protein) was calculated as the  
 621 standard deviation of the predicted peak region. The area of the polygon that encapsulates the  
 622 predicted peak region was also estimated as a proxy of prediction performance. Lastly, the  
 623 topology of the predicted datapoints for the peak region was analysed using the concept of  
 624 persistence homology (see Methods) to identify homogeneity in predicted point structure.

625  
 626  
 627  
 628  
 629  
 630  
 631  
 632

633

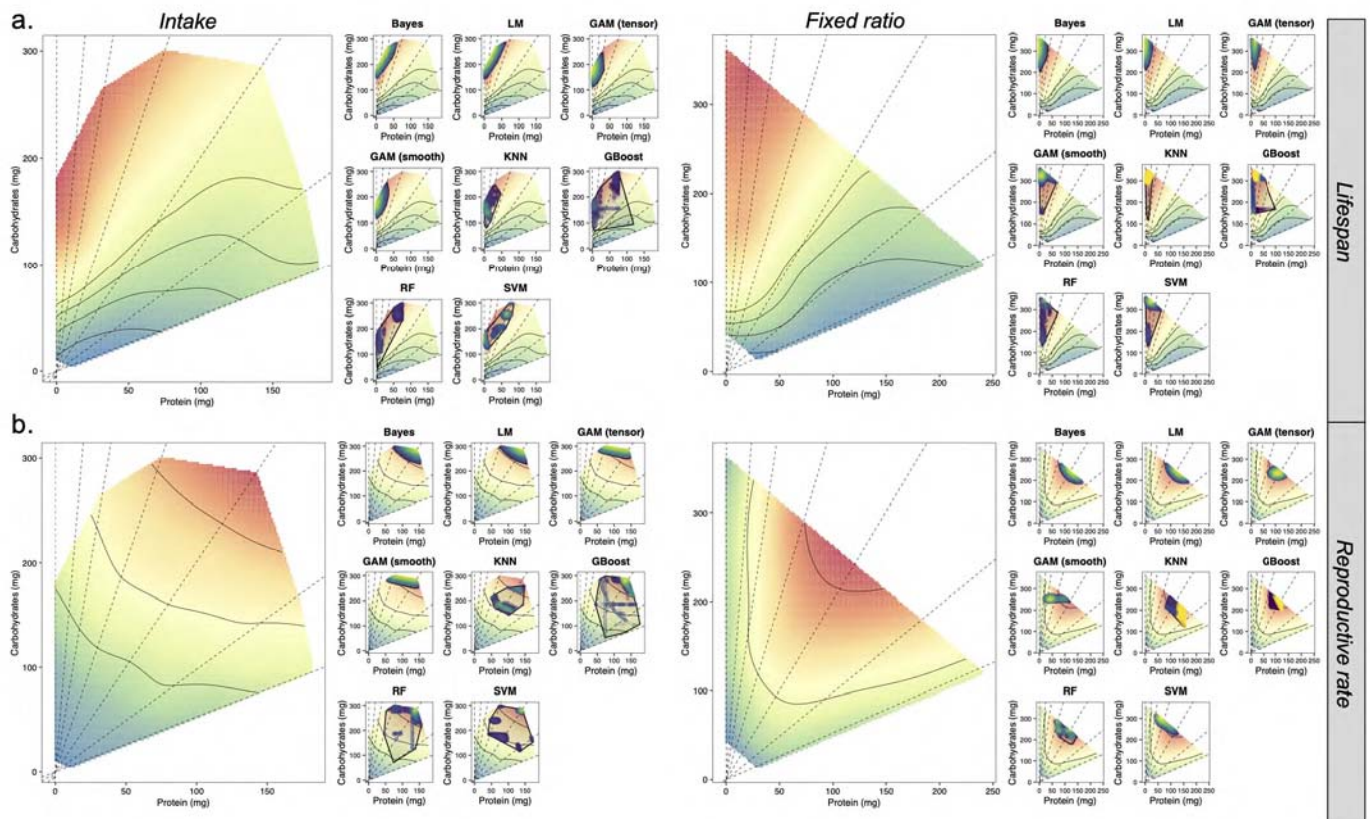

634

635 **Figure 2. Nutrigrigonometry framework to predict peak region in lifespan and**  
636 **reproductive rate landscape with different data structure.** (a) Lifespan landscapes with  
637 individual intake (top left panel) and fixed ratio (top right panel) from Lee et al. (2008)  
638 with the overlaid predicted peak regions. (b) Reproductive rate landscapes with individual intake  
639 (bottom left panel) and fixed ratio (bottom right panel) from Lee et al. (2008) with the  
640 overlaid predicted peak regions. For the landscapes, red represents peaks while light green  
641 represents valleys. For the predicted region, dark blue represents points with lower predicted  
642 z-values whereas bright yellow represents points with higher predicted z-values. The shaded  
643 polygon was added to facilitate visualisation of the predicted peak region and the  
644 homogeneity of points within the predicted peak.

645

646

647

648

649

650

651

652

653

654

655

656

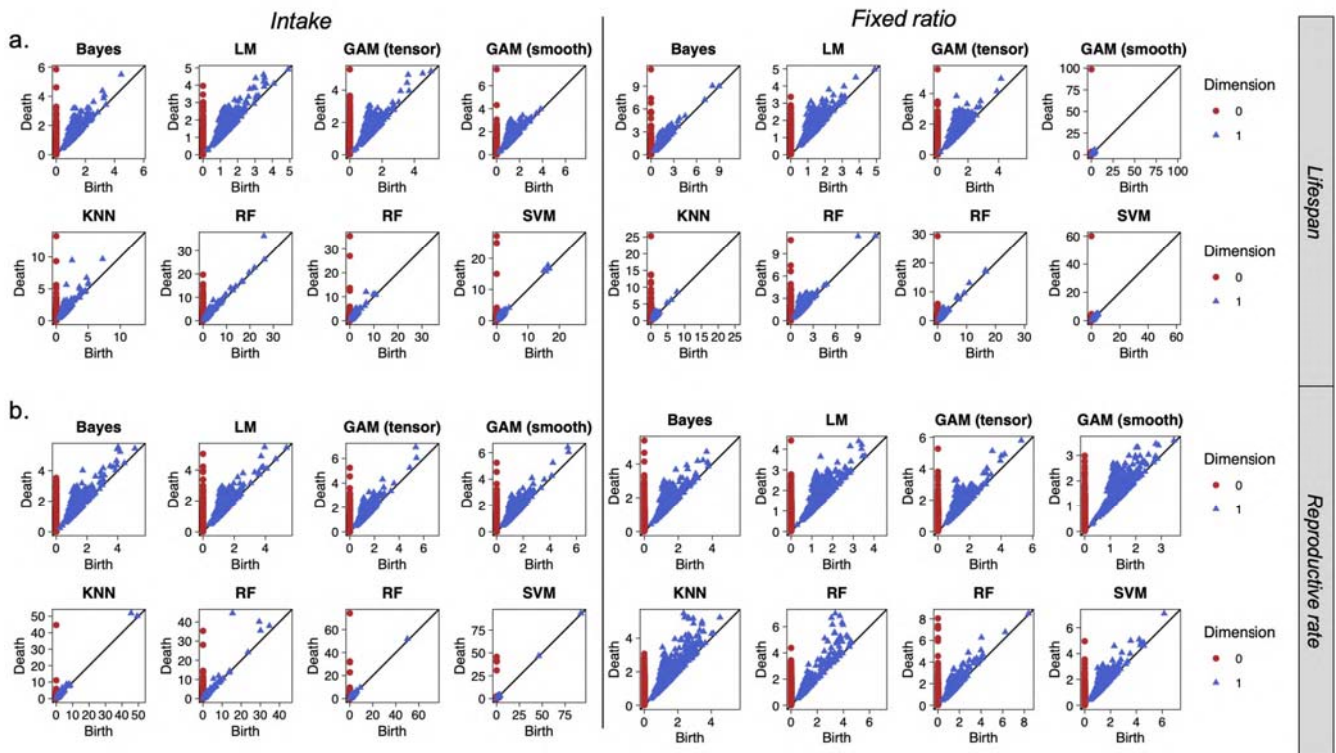

657

658 **Figure 3. Persistence Homology (PH) to investigate topological structure of the**  
 659 **predicted peak region using Nutrignonometry.** (a) PH plots for the topological analysis of  
 660 the predicted peak region in lifespan of data containing the structure of individual intake (top  
 661 left) and fixed intake data (top right). (b) PH plots for the topological analysis of the  
 662 predicted peak region in reproductive rate with data of structure containing individual intake  
 663 (bottom left) and fixed intake data (bottom right). Homogenous predicted peaks have red  
 664 (dimension 0) and blue (dimension 1) points that are closer, as opposed to more  
 665 heterogeneous predicted peaks upon which (some) points can be farther from each other.  
 666 Note the different scales upon which the data is plotted (needed to aid visualisation of point  
 667 clouds).

668

669

670

671

672

673

674

675

676

677

678

679

680

681

682

683

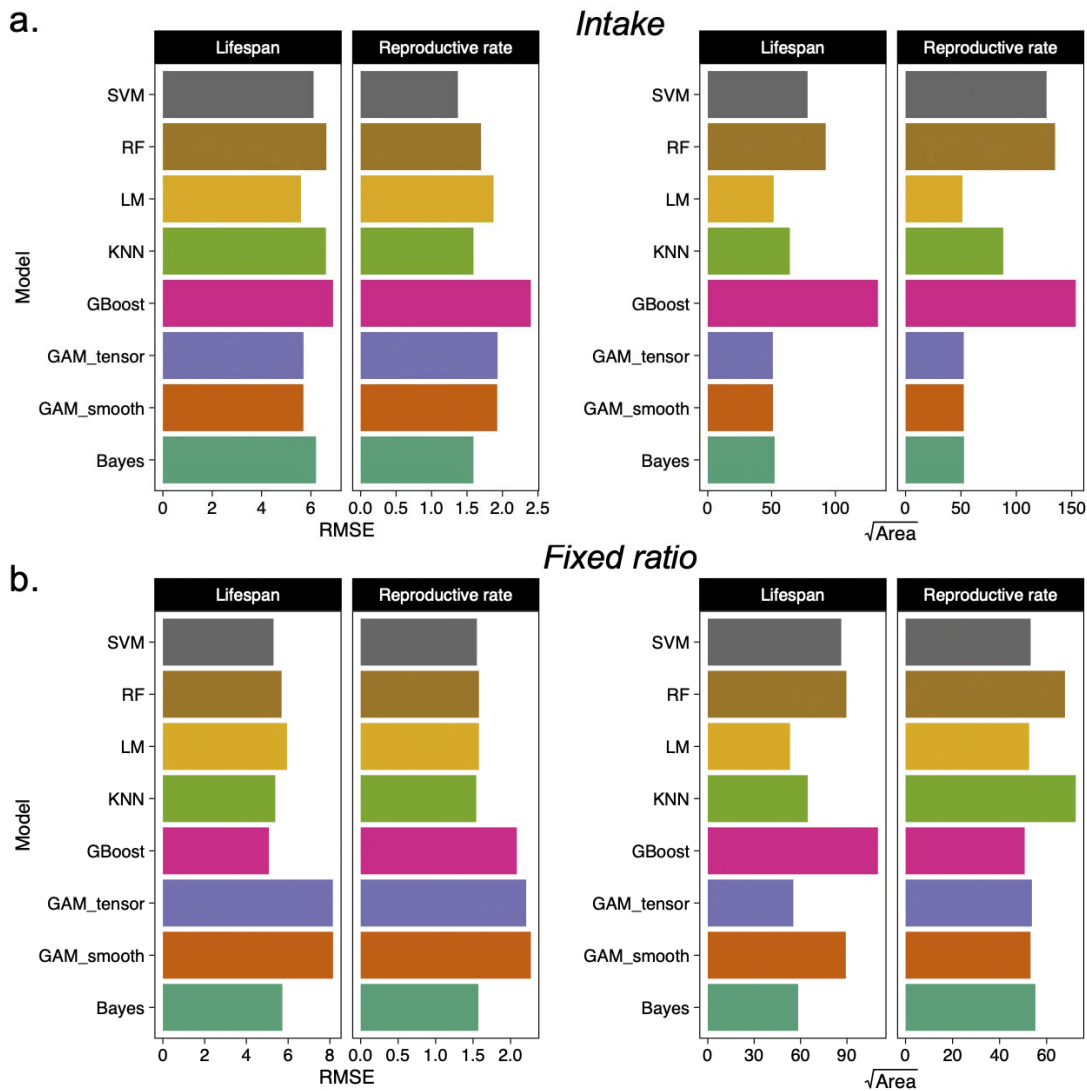

684

685 **Figure 4. RMSE and peak area estimates in the Nutrignonometry peak region**  
 686 **predictions.** (a) RMSE and predicted peak area (i.e., area of the shaded polygon from the  
 687 predicted region for lifespan and reproductive rate data), with structure containing individual  
 688 intakes. (b) RMSE and predicted peak area (i.e., area of the shaded polygon from the  
 689 predicted region for lifespan and reproductive rate data), with structure containing fixed  
 690 ratios. Note that models with high RMSE can still be the best predictors of peak region.

691

## 692 Supplementary Material

693 **Text S1. What is Persistence Homology (PH)? A brief introduction.**

694

695 **Table S1. Area of the predicted peak region for all models.** All values are given in unit  
 696 squared of nutrient intake or diet composition (for fixed ratios).

697

698 **Table S2. Nutrient spread of the predicted peak region for all models.** All values are  
699 given in units of nutrient intake or diet composition (for fixed ratios).

700

701 **Table S3. Nutrignonometry quantification of nutritional trade-offs in developmental time**  
702 **between two developmental temperatures.** Estimates of  $\theta_{i,j}$  (in degrees) and  $h_{i,j}$  (in g/L).  
703 Analysis from the data presented in Kutz et al. (2018). Confidence intervals overlapping zero  
704 implies no difference in the peaks. Magnitude of the estimates indicate the strength of  
705 nutritional trade-offs (i.e., larger magnitudes indicate stronger nutritional trade-offs). Note  
706 that  $\theta_{i,j}$  is bound between 0 and 90 degrees (i.e., 0 and  $\frac{\pi}{2}$ ).

707

708 **Figure S1.** (a) 3D landscape for developmental time at 25°C (top left) and 28°C (bottom left)  
709 (from Kutz et al., 2019) with the overlaid predicted peak regions. For the landscape, red  
710 represents peaks while light green represents valleys. For the predicted region, dark blue  
711 points represent points with lower predicted z-values whereas bright yellow represents points  
712 with higher predicted z-values. The shaded polygon was added to facilitate visualisation of  
713 the predicted peak region and the homogeneity of points within the predicted peak. (b) RMSE  
714 and predicted peak area (i.e., area of the shaded polygon in panel a) for the models of  
715 developmental time at 25°C (top right) and 28°C (bottom right) values of each model. Note  
716 that models with high RMSE can still be the best predictors of peak region. (c) Persistence  
717 homology (PH) plots for the topological analysis of the predicted peak region of the 3D  
718 landscape for developmental time at 25°C (top panel) and 28°C (bottom panel) (from Kutz et  
719 al., 2019). x and y- axes represent birth and death, respectively, of topological structures. The  
720 diagonal line represents the line in which the birth and death co-occur. Homogenous  
721 predicted peaks have red (dimension 0) and blue (dimension 1) points that are closer, as  
722 opposed to more heterogeneous predicted peaks upon which points are farther from each  
723 other.

724

725 **Figure S2. Prediction of the valley regions for lifespan using individual intake data from**  
726 **Lee et al. (2008).** Note that we used the best performing models for the peak region (see  
727 Main text).

728

729 **Figure S3. Prediction of the valley regions for reproductive rate using individual intake**  
730 **data from Lee et al. (2008).** Note that we used the best performing models for the peak  
731 region (see Main text).

732

733 **R Script.** R script with functions for the implementation of the Nutrignonometry framework

734 (separate file).

735

736

**Table 1. Nutrionometry quantification of nutritional trade-offs between lifespan and reproduction.** Estimates of  $\theta_{i,j}$  (in degrees) and  $h_{i,j}$  (in mg) for the nutritional trade-off between lifespan and reproductive rate. Analysis from the data presented in Lee et al. (2008). Confidence intervals overlapping zero implies no difference in the peaks. Magnitude of the estimates indicate the strength of nutritional trade-offs (i.e., larger magnitudes indicate stronger nutritional trade-offs). Note that  $\theta_{i,j}$  is bound between 0 and 90 degrees (i.e., 0 and  $\frac{\pi}{2}$ ).

|                        | Parameter      | Model      | Estimate | Std      | LwrCI    | UprCI   |
|------------------------|----------------|------------|----------|----------|----------|---------|
| Trade-off<br>(intakes) | $\theta_{i,j}$ | SVM        | 14.456   | 10.728   | -6.574   | 35.485  |
|                        |                | RF         | 14.508   | 8.109    | -1.388   | 30.404  |
|                        |                | GAM_tensor | 16.128   | 4.984    | 6.358    | 25.897  |
|                        |                | GAM_smooth | 16.166   | 4.962    | 6.438    | 25.893  |
|                        |                | GBoost     | 17.063   | 9.575    | -1.706   | 35.831  |
|                        |                | LM         | 17.940   | 4.826    | 8.479    | 27.400  |
|                        |                | Bayes      | 18.205   | 4.709    | 8.974    | 27.436  |
|                        | KNN            | 21.203     | 6.181    | 9.088    | 33.318   |         |
|                        | $h_{i,j}$      | SVM        | 16.792   | 65.723   | -112.038 | 145.622 |
|                        |                | KNN        | 50.015   | 48.137   | -44.343  | 144.373 |
|                        |                | GBoost     | 52.851   | 75.218   | -94.591  | 200.293 |
|                        |                | RF         | 58.561   | 66.066   | -70.943  | 188.064 |
|                        |                | LM         | 75.870   | 35.142   | 6.984    | 144.757 |
|                        |                | Bayes      | 76.729   | 34.444   | 9.211    | 144.247 |
| GAM_smooth             |                | 120.245    | 29.406   | 62.604   | 177.886  |         |
| GAM_tensor             | 124.533        | 27.930     | 69.784   | 179.282  |          |         |
| Trade-off<br>(fixed)   | $\theta_{i,j}$ | GAM_smooth | 9.645    | 5.897    | -1.916   | 21.205  |
|                        |                | SVM        | 11.840   | 5.649    | 0.767    | 22.913  |
|                        |                | RF         | 17.368   | 5.848    | 5.906    | 28.831  |
|                        |                | GBoost     | 20.177   | 5.057    | 10.264   | 30.090  |
|                        |                | GAM_tensor | 21.177   | 3.872    | 13.588   | 28.766  |
|                        | $h_{i,j}$      | Bayes      | 26.454   | 5.876    | 14.935   | 37.973  |
|                        |                | LM         | 26.499   | 5.903    | 14.928   | 38.070  |
|                        |                | KNN        | 31.428   | 7.186    | 17.342   | 45.513  |
|                        |                | SVM        | 2.381    | 68.888   | -132.653 | 137.416 |
|                        |                | RF         | 4.819    | 64.841   | -122.283 | 131.921 |
| $h_{i,j}$              | GBoost         | 9.377      | 65.605   | -119.222 | 137.975  |         |
|                        | Bayes          | 41.461     | 34.912   | -26.974  | 109.896  |         |
|                        | LM             | 42.305     | 34.429   | -25.182  | 109.791  |         |
|                        | GAM_smooth     | 46.635     | 40.358   | -32.475  | 125.745  |         |
|                        | GAM_tensor     | 49.009     | 32.855   | -15.394  | 113.412  |         |
| KNN                    | 82.516         | 30.388     | 22.949   | 142.083  |          |         |

**Table 2. Nutrigenometry estimates of nutritional compromises.** Estimates of optimal intake that maximises lifespan and reproductive rate based on the predicted peak region. Comparison made with the visual peak ratio from Lee et al. (2008). Note that all models show that the estimated peak ratio between traits do not overlap and thus, corroborate the inference of a nutritional trade-off between traits, leading to a nutritional compromise. Note also that all but one model (i.e., GAM smooth for fixed ratio reproductive rate data) predicted peak region ~1:4, which is the ratio that individuals balance when given the ability to balance their diet ('choice'). All other models suggest that a P:C ratio of 1:4 is lower than the ratio needed to maximise lifespan but higher than that for reproductive rate, further supporting the concept of a nutritional compromise.

| Data                    | Trait                | Model      | Mean   | Upr CI | Lwr CI | Target (Visual) |
|-------------------------|----------------------|------------|--------|--------|--------|-----------------|
| Peak<br>Ratio (intakes) | Lifespan             | GBoost     | 5.235  | 5.205  | 5.265  | 16              |
|                         |                      | RF         | 5.533  | 5.508  | 5.557  |                 |
|                         |                      | SVM        | 5.864  | 5.836  | 5.892  |                 |
|                         |                      | LM         | 9.084  | 9.048  | 9.120  |                 |
|                         |                      | Bayes      | 9.154  | 9.118  | 9.190  |                 |
|                         |                      | KNN        | 12.075 | 12.015 | 12.135 |                 |
|                         |                      | GAM_smooth | 13.055 | 12.997 | 13.114 |                 |
|                         |                      | GAM_tensor | 13.108 | 13.049 | 13.168 |                 |
|                         | Reproductive<br>rate | GBoost     | 1.858  | 1.853  | 1.864  | 2               |
|                         |                      | KNN        | 2.041  | 2.037  | 2.045  |                 |
|                         |                      | RF         | 2.138  | 2.133  | 2.144  |                 |
|                         |                      | SVM        | 2.147  | 2.138  | 2.156  |                 |
|                         |                      | Bayes      | 2.194  | 2.191  | 2.197  |                 |
|                         |                      | LM         | 2.215  | 2.212  | 2.219  |                 |
| GAM_smooth              |                      | 2.644      | 2.639  | 2.650  |        |                 |
| GAM_tensor              |                      | 2.661      | 2.656  | 2.667  |        |                 |
| Peak<br>Ratio (fixed)   | Lifespan             | GBoost     | 13.078 | 12.987 | 13.170 | 16              |
|                         |                      | SVM        | 14.946 | 14.873 | 15.019 |                 |
|                         |                      | RF         | 15.107 | 15.045 | 15.169 |                 |
|                         |                      | GAM_smooth | 16.977 | 16.859 | 17.097 |                 |
|                         |                      | GAM_tensor | 20.623 | 20.536 | 20.710 |                 |
|                         |                      | KNN        | 26.050 | 25.929 | 26.173 |                 |
|                         |                      | Bayes      | 32.426 | 32.237 | 32.617 |                 |
|                         |                      | LM         | 32.933 | 32.744 | 33.125 |                 |
|                         | Reproductive<br>rate | KNN        | 1.467  | 1.463  | 1.470  | 2               |
|                         |                      | LM         | 1.836  | 1.832  | 1.839  |                 |
|                         |                      | Bayes      | 1.841  | 1.837  | 1.845  |                 |
|                         |                      | GBoost     | 2.171  | 2.168  | 2.174  |                 |
|                         |                      | GAM_tensor | 2.244  | 2.241  | 2.248  |                 |
|                         |                      | RF         | 2.545  | 2.539  | 2.552  |                 |
| SVM                     |                      | 3.527      | 3.516  | 3.538  |        |                 |
| GAM_smooth              |                      | 4.280      | 4.265  | 4.296  |        |                 |
